# Supplementary material for: Mechanistic study on reduction of nitric oxide to nitrous oxide using a dicopper complex
Source: Royal Society of Chemistry journal article supplement (doi:10.1039/d2dt00275b), 2022-01-01

*Electronic Supplementary Information*

**Mechanistic Study on reduction of nitric oxide to nitrous oxide  
using a dicopper complex**

Yohei Kametani,<sup>a</sup> Tsukasa Abe,<sup>b</sup> Kazunari Yoshizawa<sup>a</sup> and Yoshihito Shiota<sup>\*a</sup>

<sup>a</sup>*Institute for Materials Chemistry and Engineering and IRCCS, Kyushu University, 744 Motoooka,  
Nishi-ku, Fukuoka 819-0395, Japan*

<sup>b</sup>*Department of Basic Science, Graduate School of Arts and Sciences, The University of Tokyo, 3-8-1  
Komaba, Meguro-ku, Tokyo, Japan*

## Table of Contents

- Figure S1.** Optimized structures of all intermediates.
- Figure S2.** Optimized structures of neutral-, mono-anion- and di-anion-  $\text{N}_2\text{O}_2$  species.
- Table S1.** Calculated Mulliken charges of all intermediates.
- Table S2.** Calculated Mulliken spin densities of all intermediates.
- Figure S3.** Overall structures of all intermediates.

**Figure S1.** Optimized structures of all intermediates in the closed-shell singlet, open-shell singlet and triplet states. Distances are given in a unit of Å.

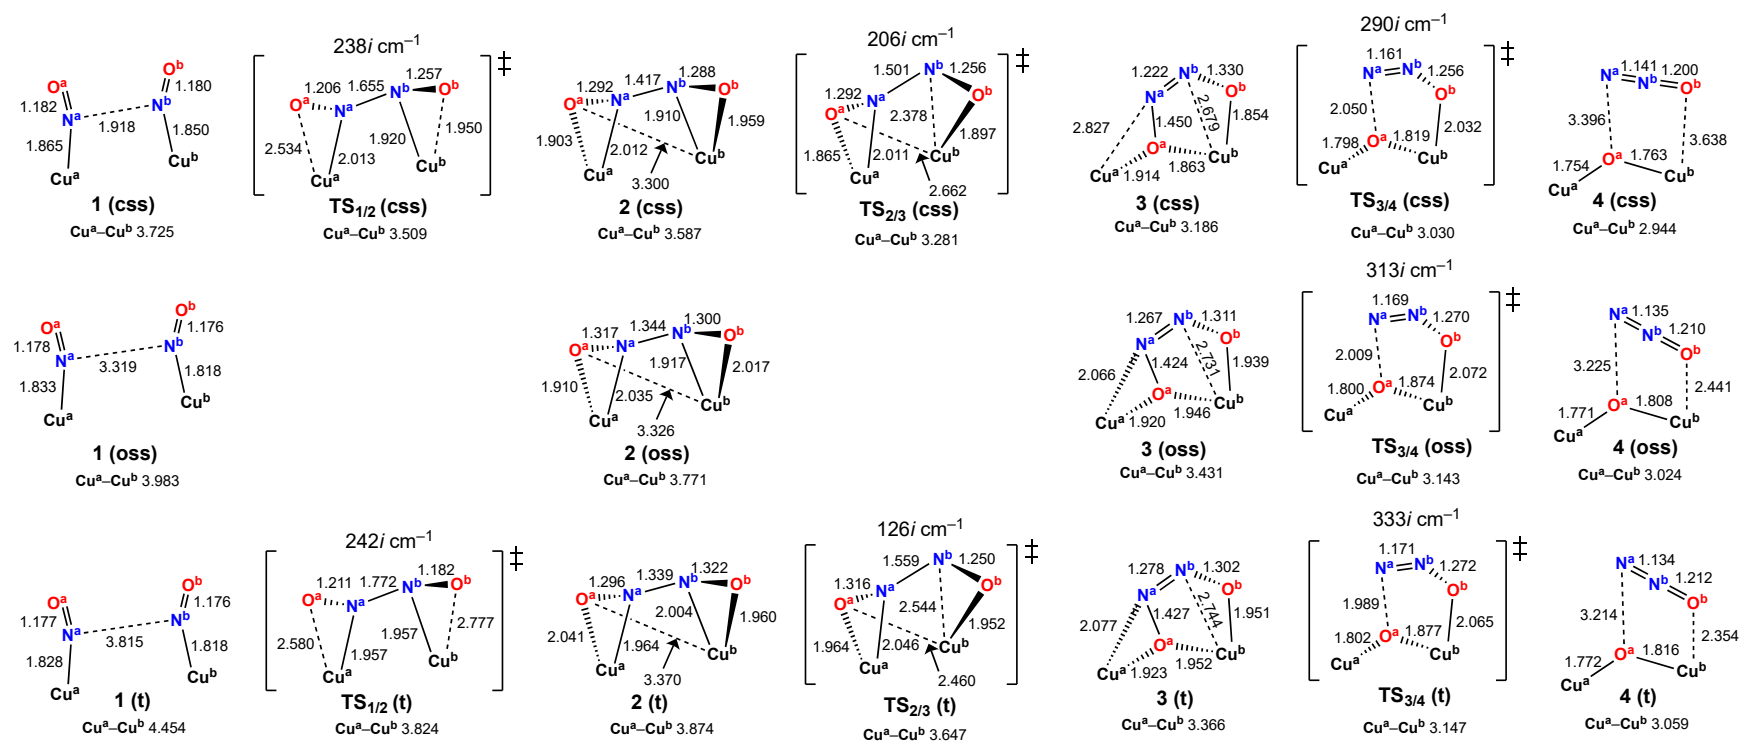

**Figure S2.** Optimized structures of neutral-, mono-anion- and di-anion  $N_2O_2$  species.

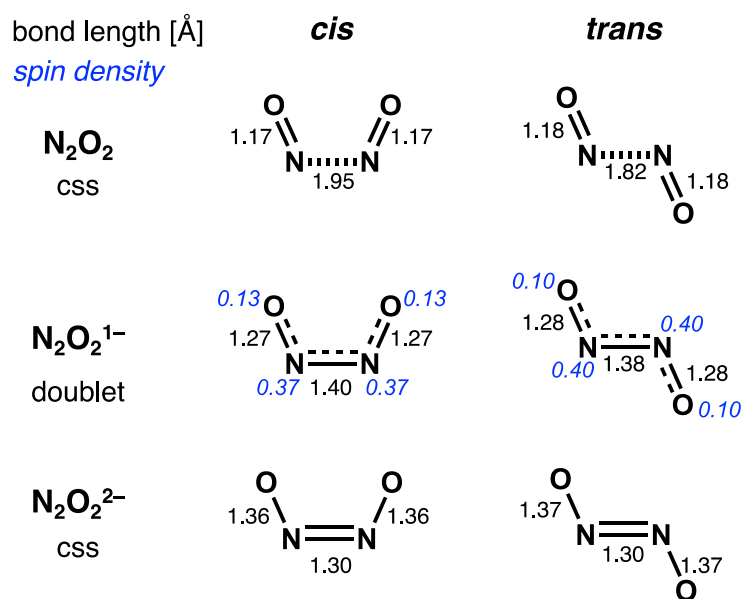

**Table S1.** Calculated Mulliken charges of all intermediates.

| <b>Closed-shell singlet</b> |          |                         |          |                         |          |                         |          |
|-----------------------------|----------|-------------------------|----------|-------------------------|----------|-------------------------|----------|
|                             | <b>1</b> | <b>TS<sub>1/2</sub></b> | <b>2</b> | <b>TS<sub>2/3</sub></b> | <b>3</b> | <b>TS<sub>3/4</sub></b> | <b>4</b> |
| <b>Cu<sup>a</sup></b>       | 0.33     | 0.31                    | 0.33     | 0.32                    | 0.43     | 0.44                    | 0.41     |
| <b>Cu<sup>b</sup></b>       | 0.28     | 0.24                    | 0.25     | 0.32                    | 0.38     | 0.36                    | 0.48     |
| <b>N<sup>a</sup></b>        | 0.09     | 0.11                    | 0.12     | 0.08                    | 0.11     | 0.04                    | -0.08    |
| <b>N<sup>b</sup></b>        | 0.09     | 0.08                    | 0.13     | 0.11                    | 0.11     | 0.29                    | 0.35     |
| <b>O<sup>a</sup></b>        | -0.07    | -0.09                   | -0.24    | -0.21                   | -0.46    | -0.57                   | -0.54    |
| <b>O<sup>b</sup></b>        | -0.07    | -0.17                   | -0.24    | -0.17                   | -0.29    | -0.22                   | -0.21    |

  

| <b>Open-shell singlet</b> |          |                         |          |                         |          |                         |          |
|---------------------------|----------|-------------------------|----------|-------------------------|----------|-------------------------|----------|
|                           | <b>1</b> | <b>TS<sub>1/2</sub></b> | <b>2</b> | <b>TS<sub>2/3</sub></b> | <b>3</b> | <b>TS<sub>3/4</sub></b> | <b>4</b> |
| <b>Cu<sup>a</sup></b>     | 0.31     | -                       | 0.34     | -                       | 0.44     | 0.51                    | 0.45     |
| <b>Cu<sup>b</sup></b>     | 0.30     | -                       | 0.29     | -                       | 0.39     | 0.38                    | 0.41     |
| <b>N<sup>a</sup></b>      | 0.05     | -                       | 0.13     | -                       | 0.07     | 0.04                    | -0.08    |
| <b>N<sup>b</sup></b>      | 0.06     | -                       | 0.14     | -                       | 0.07     | 0.24                    | 0.40     |
| <b>O<sup>a</sup></b>      | -0.04    | -                       | -0.30    | -                       | -0.40    | -0.60                   | -0.60    |
| <b>O<sup>b</sup></b>      | -0.03    | -                       | -0.28    | -                       | -0.32    | -0.28                   | -0.21    |

  

| <b>Triplet</b>        |          |                         |          |                         |          |                         |          |
|-----------------------|----------|-------------------------|----------|-------------------------|----------|-------------------------|----------|
|                       | <b>1</b> | <b>TS<sub>1/2</sub></b> | <b>2</b> | <b>TS<sub>2/3</sub></b> | <b>3</b> | <b>TS<sub>3/4</sub></b> | <b>4</b> |
| <b>Cu<sup>a</sup></b> | 0.32     | 0.35                    | 0.41     | 0.41                    | 0.44     | 0.51                    | 0.45     |
| <b>Cu<sup>b</sup></b> | 0.30     | 0.35                    | 0.26     | 0.35                    | 0.40     | 0.38                    | 0.41     |
| <b>N<sup>a</sup></b>  | 0.06     | 0.02                    | 0.26     | 0.05                    | 0.05     | 0.04                    | -0.07    |
| <b>N<sup>b</sup></b>  | 0.06     | 0.09                    | 0.00     | 0.07                    | 0.08     | 0.24                    | 0.40     |
| <b>O<sup>a</sup></b>  | -0.04    | -0.10                   | -0.25    | -0.27                   | -0.40    | -0.58                   | -0.59    |
| <b>O<sup>b</sup></b>  | -0.03    | -0.04                   | -0.31    | -0.17                   | -0.30    | -0.28                   | -0.21    |

**Table S2.** Calculated Mulliken spin densities of all intermediates.

| <b>Open-shell singlet</b> |          |                         |          |                         |          |                         |          |
|---------------------------|----------|-------------------------|----------|-------------------------|----------|-------------------------|----------|
|                           | <b>1</b> | <b>TS<sub>1/2</sub></b> | <b>2</b> | <b>TS<sub>2/3</sub></b> | <b>3</b> | <b>TS<sub>3/4</sub></b> | <b>4</b> |
| <b>Cu<sup>a</sup></b>     | 0.01     | -                       | 0.37     | -                       | 0.53     | 0.62                    | 0.51     |
| <b>Cu<sup>b</sup></b>     | -0.01    | -                       | -0.34    | -                       | -0.57    | -0.56                   | -0.61    |
| <b>N<sup>a</sup></b>      | 0.60     | -                       | -0.17    | -                       | 0.02     | 0.02                    | -0.02    |
| <b>N<sup>b</sup></b>      | -0.61    | -                       | 0.11     | -                       | 0.03     | 0.03                    | 0.01     |
| <b>O<sup>a</sup></b>      | 0.38     | -                       | 0.00     | -                       | 0.03     | -0.05                   | 0.16     |
| <b>O<sup>b</sup></b>      | -0.38    | -                       | 0.03     | -                       | -0.05    | -0.08                   | -0.01    |

  

| <b>Triplet</b>        |          |                         |          |                         |          |                         |          |
|-----------------------|----------|-------------------------|----------|-------------------------|----------|-------------------------|----------|
|                       | <b>1</b> | <b>TS<sub>1/2</sub></b> | <b>2</b> | <b>TS<sub>2/3</sub></b> | <b>3</b> | <b>TS<sub>3/4</sub></b> | <b>4</b> |
| <b>Cu<sup>a</sup></b> | 0.01     | 0.26                    | 0.48     | 0.45                    | 0.53     | 0.62                    | 0.50     |
| <b>Cu<sup>b</sup></b> | 0.01     | 0.06                    | 0.38     | -0.32                   | 0.59     | 0.56                    | 0.59     |
| <b>N<sup>a</sup></b>  | 0.62     | 0.45                    | 0.40     | 0.77                    | 0.00     | -0.05                   | 0.02     |
| <b>N<sup>b</sup></b>  | 0.61     | 0.29                    | -0.10    | 0.49                    | 0.09     | 0.01                    | -0.01    |
| <b>O<sup>a</sup></b>  | 0.38     | 0.51                    | 0.44     | 0.44                    | 0.20     | 0.39                    | 0.55     |
| <b>O<sup>b</sup></b>  | 0.38     | 0.34                    | 0.10     | 0.11                    | 0.20     | 0.09                    | 0.02     |

**Figure S3.** Overall structures of all intermediates. The color of the balls indicates the type of atom, gray (C), blue (N), red (O), and orange (Cu). H atoms are omitted for clarity. Distances are given in a unit of Å.

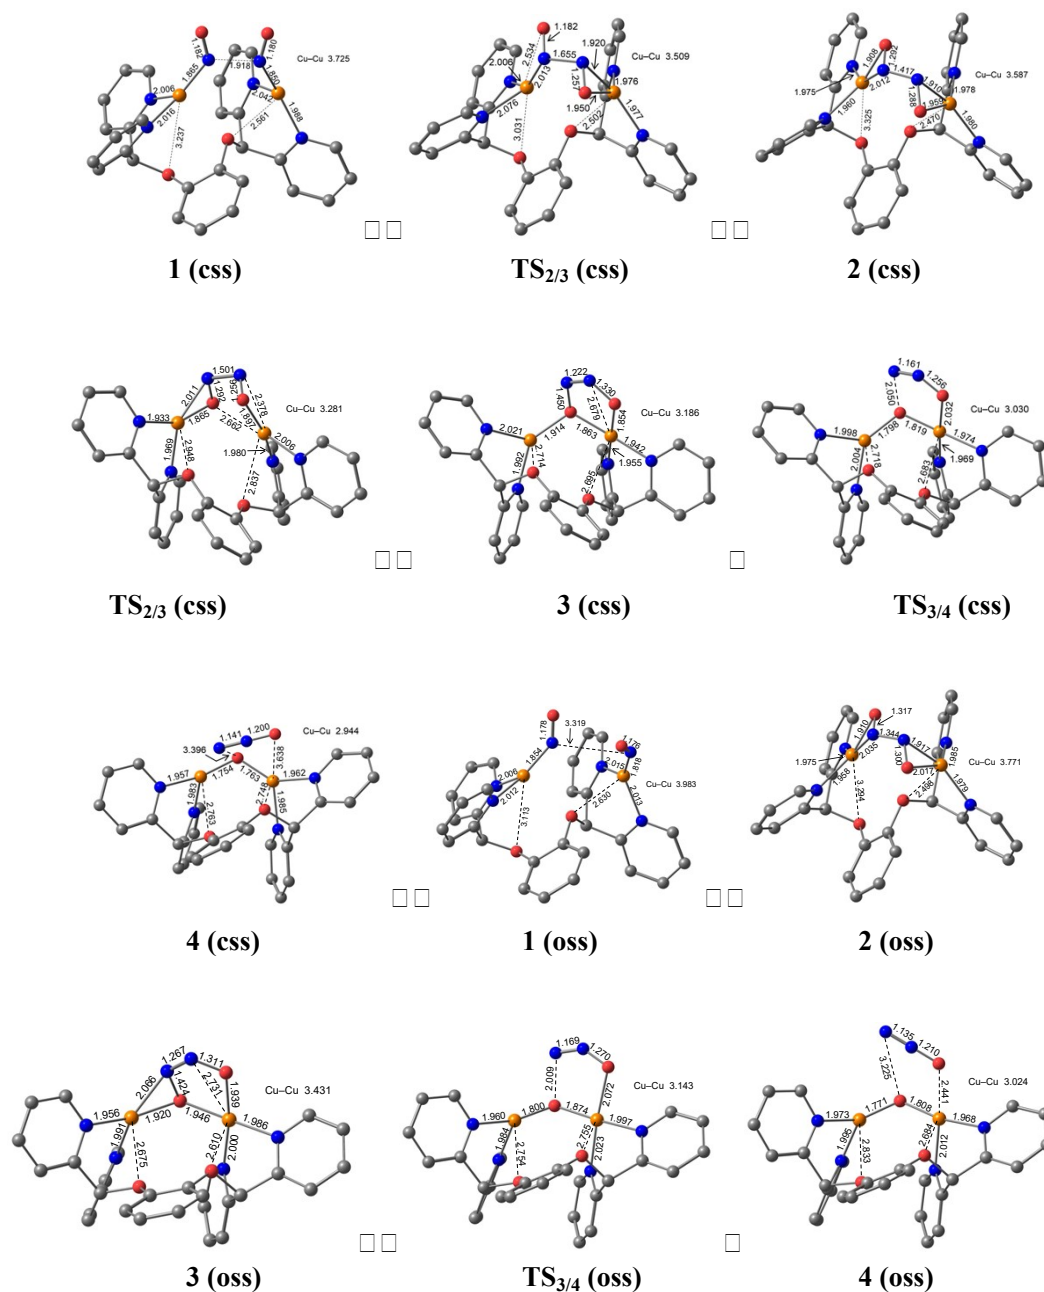

Supplement: d2dt00275b13.pdf [file d2dt00275b13.pdf]
